# Supplementary material for: Perceptions of Weight and Health Practices in Hispanic Children: A Mixed-Methods Study
Source: PubMed Central journal article supplement (PMC4561986; doi:10.1155/2015/761515), 2015-08-25
Supplement: 761515.f1.pdf [file 761515.f1.pdf]

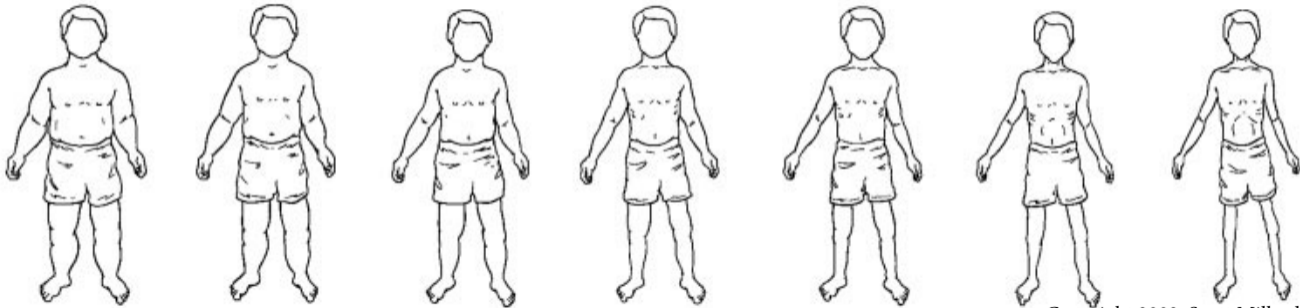

Copyright 2003, Scott Millard

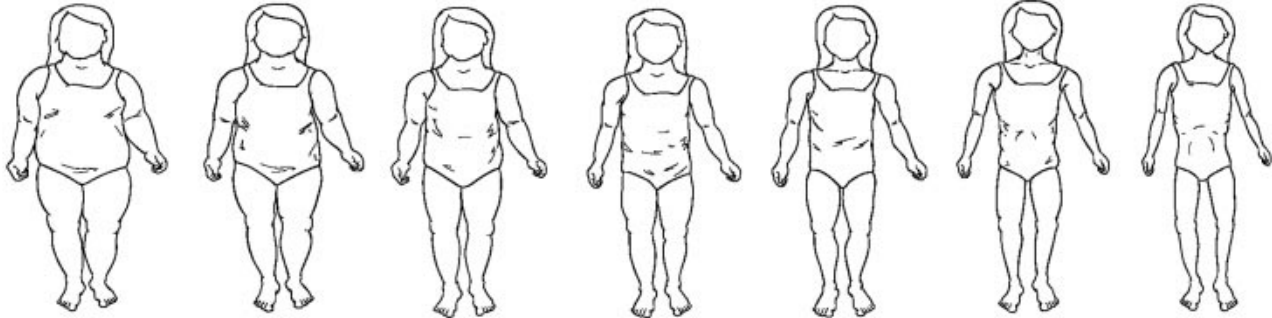

Copyright 2003, Scott Millard
